# Supplementary material for: Evc is a positive mediator of Ihh-regulated bone growth that localises at the base of chondrocyte cilia
Source: Oxford University Press journal article supplement (doi:10.1242/dev.007542), 2007-07-27
Supplement: dev007542tables1.pdf [file dev007542tables1.pdf]

**Table S1. Bone measurements from X-ray images of *Evc<sup>-/-</sup>* and control mice**

|                                  | Average measurement±s.e. (mm) |                          | ANOVA <i>P</i> value    |
|----------------------------------|-------------------------------|--------------------------|-------------------------|
|                                  | Control <sup>§</sup>          | <i>Evc<sup>-/-</sup></i> |                         |
| <b>P1</b>                        | <b>(n=5-8)</b>                | <b>(n=4-5)</b>           |                         |
| Body length <sup>†</sup>         | 18.3±0.49                     | 17.2±1.53                | ns                      |
| Skull length                     | 8.9±0.40                      | 8.2±0.30                 | ns                      |
| Skull width                      | 7.3±0.27                      | 7.1±0.30                 | ns                      |
| Rib cage width <sup>‡</sup>      | 8.2±0.33                      | 6.9±0.10                 | 0.013*                  |
| Humerus                          | 3.1±0.19                      | 2.7±0.11                 | ns                      |
| Ulna                             | 3.4±0.14                      | 2.8±0.18                 | 0.019*                  |
| Radius                           | 2.6±0.14                      | 2.0±0.24                 | 0.038*                  |
| Femur                            | 2.7±0.10                      | 1.8±0.10                 | 1×10 <sup>-5</sup> ***  |
| Tibia                            | 3.1±0.14                      | 2.1±0.15                 | 0.0002***               |
| Ratio rib cage width:body length | 0.44±0.01                     | 0.41±0.04                | ns                      |
| Ratio radius:humerus             | 0.90±0.04                     | 0.75±0.07                | ns                      |
| Ratio tibia:femur                | 1.26±0.03                     | 1.17±0.09                | ns                      |
| <b>P18</b>                       | <b>(n=3-6)</b>                | <b>(n=4)</b>             |                         |
| Body length <sup>†</sup>         | 38.7±0.19                     | 31.6±0.14                | 0.0001***               |
| Skull length                     | 15.4±0.41                     | 13.8±0.89                | ns                      |
| Skull width                      | 10.5±0.10                     | 10.3±0.08                | ns                      |
| Rib cage width <sup>‡</sup>      | 16.7±0.50                     | 12.0±0.25                | 5×10 <sup>-5</sup> ***  |
| Humerus                          | 6.9±0.13                      | 5.4±0.12                 | 3×10 <sup>-7</sup> ***  |
| Ulna                             | 9.4±0.10                      | 6.2±0.06                 | 1×10 <sup>-8</sup> ***  |
| Radius                           | 7.7±0.06                      | 4.8±0.10                 | 9×10 <sup>-16</sup> *** |
| Femur                            | 6.6±0.15                      | 5.2±0.17                 | 7×10 <sup>-6</sup> ***  |
| Tibia                            | 10.6±0.13                     | 6.9±0.12                 | 1×10 <sup>-13</sup> *** |
| Ratio rib cage width:body length | 0.43±0.02                     | 0.37±0.01                | 0.00853**               |
| Ratio radius:humerus             | 1.12±0.02                     | 0.89±0.04                | 0.00065**               |
| Ratio tibia:femur                | 1.62±0.05                     | 1.34±0.03                | 0.0045**                |

Significant differences between *Evc<sup>-/-</sup>* and control: \*, *P*<0.05; \*\*, *P*<0.01; \*\*\*, *P*<0.0005.

ns, Difference not significant.

<sup>†</sup>Not including head and tail.

<sup>‡</sup>Measured at widest part of rib cage.

<sup>§</sup>Bone measurements of wild-type and heterozygous mice were combined and denoted as control as they did not differ significantly.
